# Supplementary material for: Facile synthesis of homogeneous CuInS2 quantum dots with tunable near-infrared emission
Source: Royal Society of Chemistry journal article supplement (doi:10.1039/c5tc04232a), 2016-01-01
Supplement: c5tc04232a1.pdf [file c5tc04232a1.pdf]

## Supporting Information

### **Facile synthesis of homogeneous CuInS<sub>2</sub> quantum dots with tunable near-infrared emitting**

Kezhen Qi,<sup>a</sup> Yu Wang,<sup>b</sup> Ruidan Wang,<sup>a</sup> Di Wu,<sup>a</sup> Guo-Dong Li<sup>c\*</sup>

<sup>a</sup> College of Chemistry and Chemical Engineering, Shenyang Normal University, Shenyang, 110034, P.R. China.

<sup>b</sup> College of Chemistry, Nankai University, Tianjin, 300071, P.R. China.

<sup>c</sup> State Key Laboratory of Inorganic Synthesis and Preparative Chemistry, College of Chemistry, Jilin University, Changchun, 130012, P.R. China

\*corresponding author: [lgd@jlu.edu.cn](mailto:lgd@jlu.edu.cn)

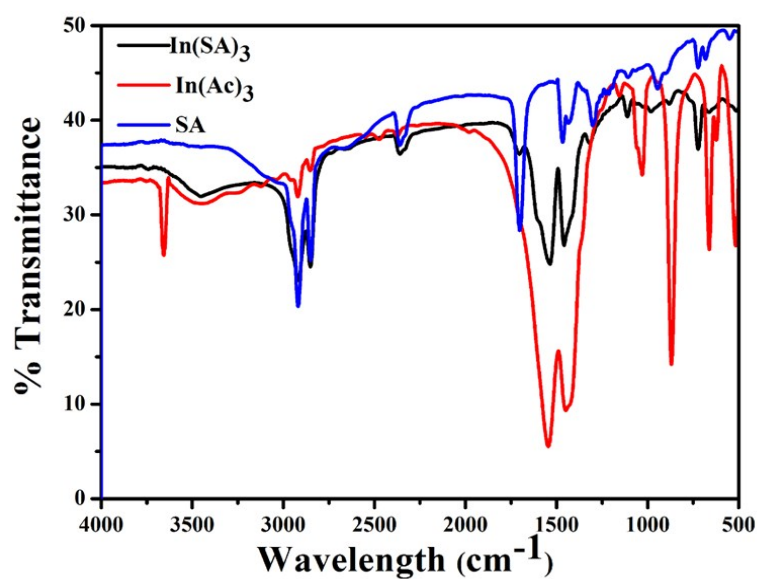

**Figure S1.** FT-IR spectra of SA, In(Ac)<sub>3</sub> and In(SA)<sub>3</sub>.

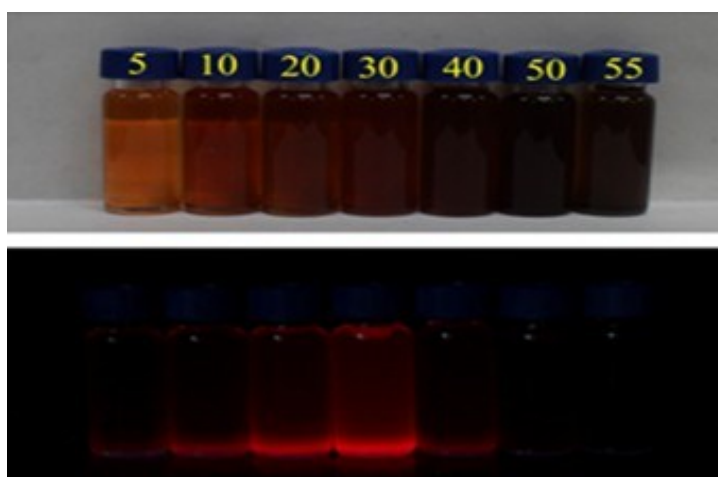

**Figure S2.** Photograph of different sized CuInS<sub>2</sub> nanoparticles under sunlight (upper) and UV light (lower) irradiation.

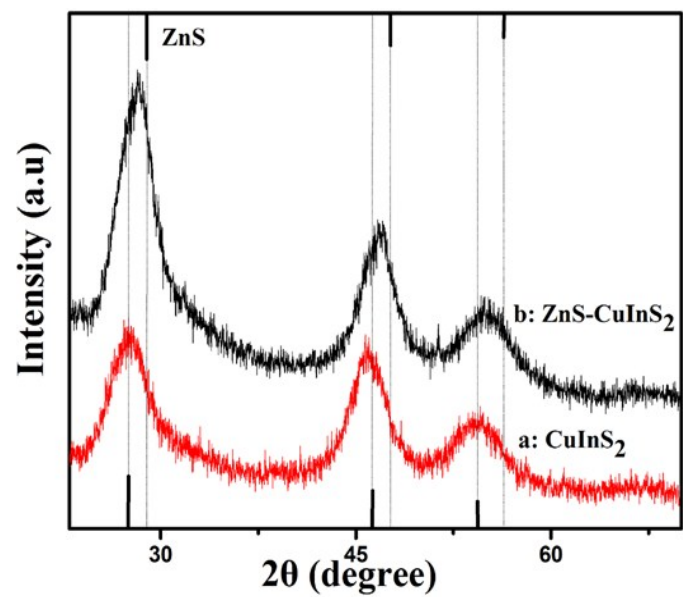

**Figure S3.** XRD patterns of CuInS<sub>2</sub> (a) and CuInS<sub>2</sub>/ZnS (b).

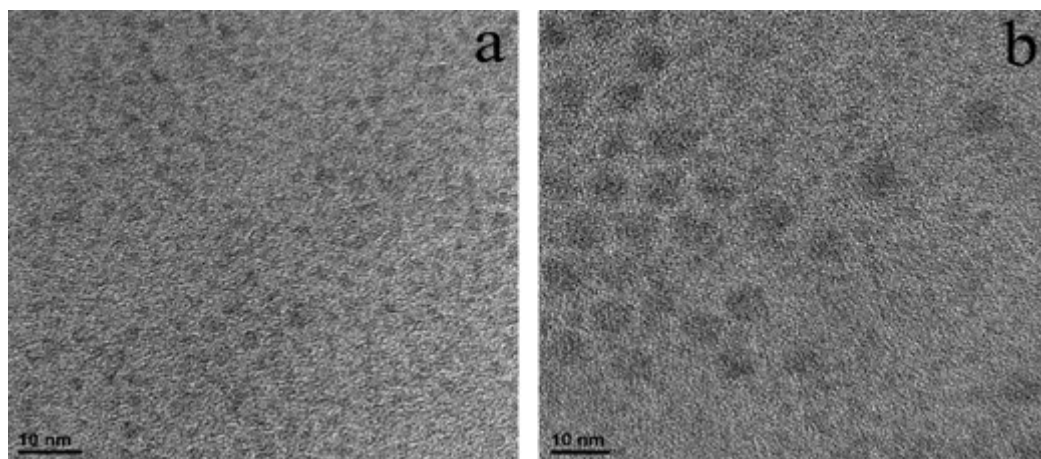

**Figure S4.** (a) HRTEM images of CuInS<sub>2</sub> and (b) CuInS<sub>2</sub>/ZnS QDs.
